# Supplementary material
Source: PubMed Central journal article supplement (PMC2944538)
Supplement: supp_192_19_5081__1.pdf [file supp_192_19_5081__1.pdf]

# SUPPLEMENTARY

Figure S1

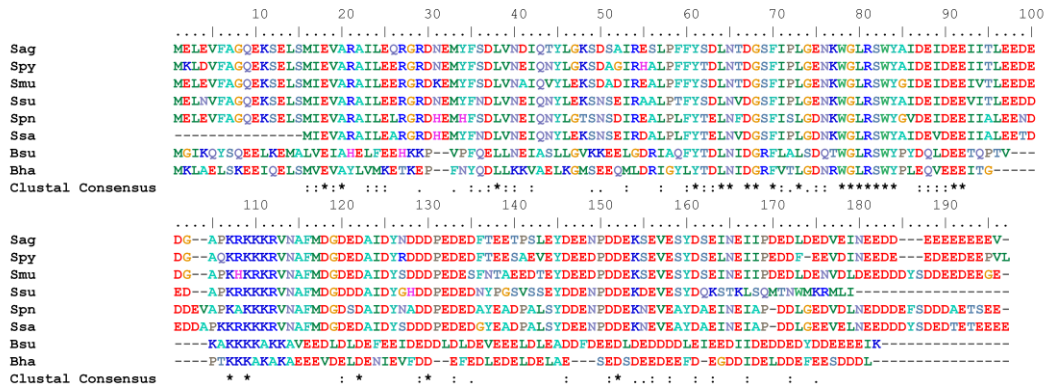

## S1. Amino acid sequence alignment of delta proteins using CLUSTAL W 2.0.

Identical amino acid residues are marked with a star, strongly similar with two dots, and weakly similar with one dot. The default colourscheme is used for alignments. Species abbreviations: Sag, *S. agalactiae*; Spy: *S. pyogenes* M1 GAS; Smu, *S. mutans* UA159; Ssu, *S. suis* 98HAH33; Spn, *S. pneumoniae* G54; Ssa, *S. sanguinis* SK36; Bsu: *Bacillus subtilis* ; Bha: *B. halodurans* C-125.

Figure S2

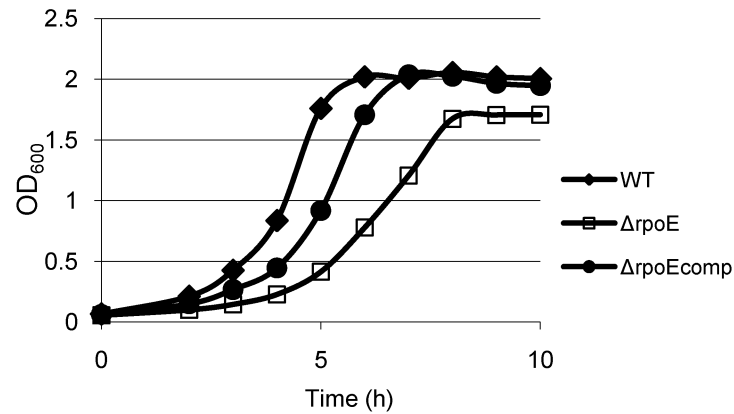

### S2. Growth defects of *S. mutans* $\Delta rpoE$ strain.

The growth of *S. mutans* cultures in THBY medium pH7.5 at 37 °C in an atmosphere of 5% CO<sub>2</sub> were recorded every hour by measuring the absorbance (optical density) at 600nm. Strains: WT (wild type),  $\Delta rpoE$ ,  $\Delta rpoE_{comp}$  ( $\Delta rpoE$  complementation). The data is a representative result from at least three independent experiments.

Figure S3

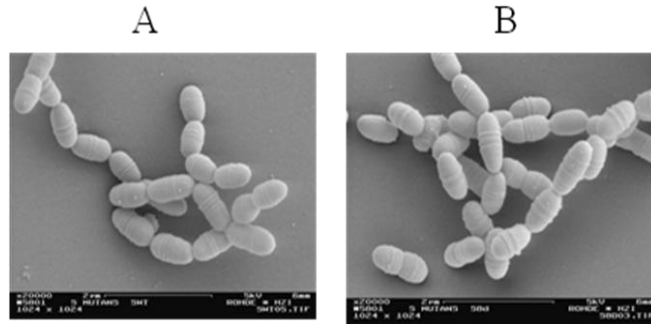

**S3. *S. mutans* wild type and  $\Delta rpoE$  strains cell phenotype under scanning electron microscopy.**

A: wild type strain; B:  $\Delta rpoE$  mutant.

Figure S4

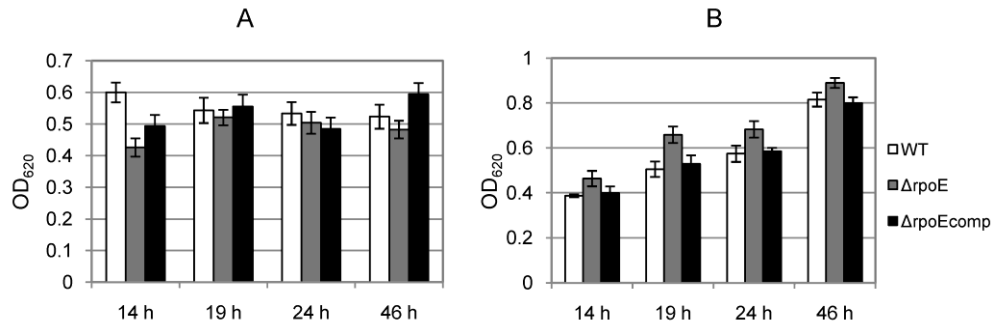

#### S4. Biofilm quantification by crystal violet staining.

Biofilm of *S. mutans* wild-type (blue columns),  $\Delta rpoE$  (red columns), and  $\Delta rpoE_{comp}$  (green columns) grown in 96-well microtiter plates in THBYS (A) and BMS (B) medium were stained at different time points with 0.1% crystal violet and the absorbance of the extracted stain was measured at 620 nm. Data presented above is representative result from at least three independent experiments. Mean and standard deviation of twelve replicas of each sample are given.

Figure S5

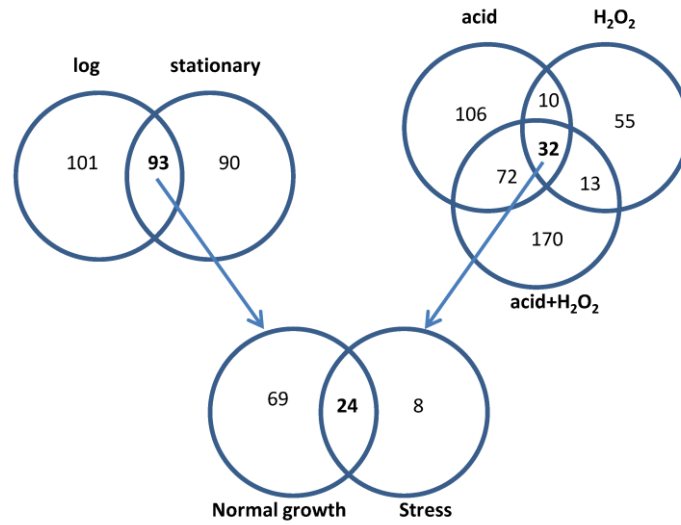

**S5. Venn diagram showing the number of differentially expressed genes in the  $\Delta rpoE$  mutant compared to the wild type strain under 5 experimental conditions.**

Sample collection was as following: Log, M0/W0; stationary, M1/W1; acid, M2/W2; H<sub>2</sub>O<sub>2</sub>, M3/W3; acid + H<sub>2</sub>O<sub>2</sub>, M4/W4.

Figure S6

**smu-r1**

**A**

>chromosome Streptococcus mutans UA159 (Nucleotides 530356 - 530591 Reverse Strand)

-35

GAGTTACTCCTCTAAAATGATATGACATATTATATTACAATTTGAATAAAAATACAAGTT

-10                      Transcription start

ACCTTTTAACAATTTACAAAGAGCAAAAGCAGACAAACAACAAGTCCCCTAAAACTATTA

TTTAATCAACAACACCAAAAATAAAGCTCTTGTACTGAACTTTAAAAAGGAGTCCAGAAC

TGAACTGCACCCCAAAAGTTAGACAGAAAAATCTAACTTTTGGGGTGTTTTTATT

Terminator

**B**

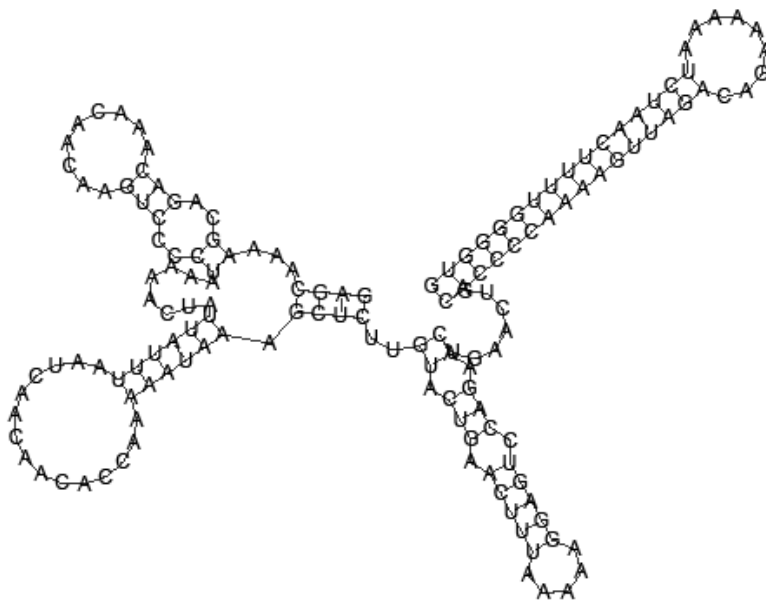

**C**

r1.1 **SMU.948** hypothetical protein

|                |    |                                                                    |    |
|----------------|----|--------------------------------------------------------------------|----|
| sRNA           | 2  | AGCAAAAAGCAGACAAACAACAAGUCCCG--UAAAAACUAUUUUUUUAUCAACAACACCAAAAAUA | 64 |
|                |    | :                                                                  |    |
| mRNA (SMU.948) | 69 | UCCUUGUCGUGUAUUUUUAGUUUAGUGUUUUAUUUUU--UCGUCAUUUA----UGUGGUUUUUUAU | 12 |

r1.2 **SMU.1025** putative transcriptional regulator

|                 |     |                    |      |
|-----------------|-----|--------------------|------|
| sRNA            | 100 | ACUGAACUGCACCCCAAA | 117  |
|                 |     |                    |      |
| mRNA (SMU.1025) | -89 | UGACUUGACGUGGGUUU  | -106 |

r1.3 **SMU.2059c** putative integral membrane protein

|                  |    |                                                          |    |
|------------------|----|----------------------------------------------------------|----|
| sRNA             | 1  | GAGCAAA-AGCAGACAAACAAGUCCCUAAAAACUAAU---AUUUAAUCAACA     | 52 |
|                  |    | :   :                                                    |    |
| mRNA (SMU.2059c) | 55 | CUCGUUAAUUCUUUGUCUCUUGUUCAGG--ACUAAUAAAAACUUUAAAUUCGCUGU | 2  |

r1.4 **SMU.327** DNA repair protein RadA

|                |      |                                             |      |
|----------------|------|---------------------------------------------|------|
| sRNA           | 48   | CAACAACACCAA-AAAUA--AAGCUCU-UGUACUGAACUUU   | 84   |
|                |      | :             :   :                         |      |
| mRNA (SMU.327) | -119 | GUAGUUGUGGUUAAUUUAAGAUAUUGAGAGACGUGGC--GAAA | -157 |

r1.5 **SMU.1507c** hypothetical protein

|                  |    |                                  |    |
|------------------|----|----------------------------------|----|
| sRNA             | 28 | CCUAAAAACU-AUU---AUUUAAUCAACAACA | 55 |
|                  |    | :                                |    |
| mRNA (SMU.1507c) | 71 | GGAUUUUGAGUAGCAGUUAAAAUAGUUGUUGU | 39 |

**S6. Predicted smu-r1 promoter and terminator (A), secondary structure (B), and interaction with target mRNAs (C). A: The putative -35 and -10 regions were marked by green colour. The sequence of smu-r1 was underlined. The predicted transcription start was indicated by bold, while the putative terminator was marked by red colour.**

Figure S7

**smu-r2**

**A**

>chromosome Streptococcus mutans UA159 (Nucleotides 739911 - 740429 Reverse Strand)  
TTCATATCCTCCCCTAACATTCAATAATAATTTAAAGCAAACCAGATAATCTTATTTTAC  
AGACAATCATAACCTTATTACATTTTACTTCTCACTTCAAAGAATAGCTGCCAAAACAACA  
GACTAATCACTCCGCTTATATTATAGCATAAAAATATTATGCAGAAGTTAGGATTATATAA  
TGTAGCGAAAGTCAAAGCTCAGCAATATTGCAGCATTCTATACTAACAACATAACTTGAG  
-35 -10 Transcription start  
AGTGACATTAACAATAAAAATTAACGGCAACTTCCTAAAATTAGCTCCAATCACCTTTC  
AGAACGAAAATTGAATGTGAGATAGCGCCGACTGACTAACAACTCTGGATAAGGAAATCAC  
AACCTTCTAAATTTCAATTATTAACCTATCAAAAATAATCACTTTGGAGAACATATTA  
AACCGTATGGCGTATAGTTATACGGTTTTAATGCTCACTTTTACACTGCAAAAAGCCTTG  
GTTTCAAGGCTTTTATTGCTACGATTTGTCAAAGGTTT  
Terminator

**B**

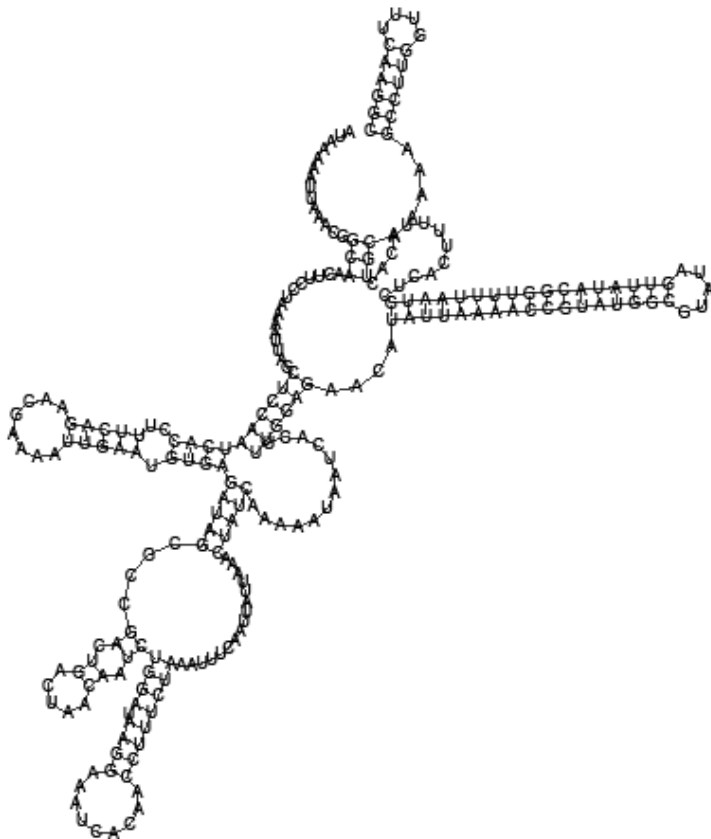



C

r2.1 murB UDP-N-acetylenolpyruvoylglucosamine reductase

sRNA 60 AUAAGGAAAUACAAC-CUUUCUAAAUUU-----CAAUU-AUUAAACUAUCAAAAAUAU--C---ACUUUGGAGACAUAUUAAAACCGUAUGGGCUAUGUUAUAC-GGUUUUA--AUGCUCACUUUACACUGC 181  
 ||| ||| ||| ||| |:|||||:| | || ||| ||| ||| | : ||| |||| | ||||||| | | ||| |:| ||| |:| ||| ||| : | ||||| ||:|  
 mRNA (murB) 50 UAUGCCUAUAG--UUGCGGAAGAUUUGAAAACAAGUAAAGUAAAUG-UAGUAAUCGAUAAAGAGAUGAAAA---GUAUAAUUUUU---UAGC-CAU-UUAAUUUGCUAAAAUAAUAGUUUAAAUG-GAUG -74

r2.2 SMU.896 hypothetical protein

Score: -97 Pvalue: 0.000684607

sRNA 77 UUCUAAAAUUUCAUUUAAA-CUAUCAAAA 107  
 |:||| | |:||||:|:| ||| |||||||  
 mRNA (SMU.896) -10 AGAGACUAAAGGUUAGUAGUUUUGAUAGUUUU -41

r2.3 SMU.213c hypothetical protein

Score: -88 Pvalue: 0.00236569

sRNA 75 CCUUUCUAAAUUUCAUUUAAAAC-UAUCAAAAAUUAUCUUU 118  
 ||||||||| || |:|||| : :||| || | |||||  
 mRNA (SMU.213c) -12 GGAAAGAUUUAA---UAUUAGUUUGUGCGGUUUUAGU--UGAAA -51

r2.4 SMU.1969c putative transcriptional regulator

sRNA 17 CGAAAAUUGAUGUGAGAUAGCGCCGACUGACU--AACAAUCUGGAUAG--GAAUUCAC-A--ACCUUUUCAAAAUUUCAU-UA-UUAAACUAUCAAAAAUUAUCACUUUGGA--GAACAUU--UAAAA 134  
 ||||||||| ||| ||: || | | ||||| : ||| ||||| || | :||| | ||||| || | ||| ||| ||| ||||| :|||  
 mRNA (SMU.1969c) 78 GCUUUUAACUGACA-----GGUAGA--GAACUCGUUAGAUUAGACUUUAGGGGUUCUUGAAGAUU-AAAGUUUAUUAGUGGGAAGACU--AAUAGUCA--CCUAAUCUGAUUUAUUGUUUU -38

r2.5 cysK putative cysteine synthetase A; O-acetylserine lyase

Score: -83 Pvalue: 0.00470788

sRNA 59 GAUAAGGAAAUACAACCUUUUCAAAAUUCAAUUUAAACUAUCAAAAAUUAUCACUUUGGAG 122  
 ||||||||| ||| : ||:||||| ||| | ||:| | |:| | |||:|  
 mRNA (cysK) -81 CUAUUCUUUAGUAUAGUGCCC--UUGAAGUUUAAACUAAUGGUCGUUGU-ACCGAAAUAUC -141

r2.6 SMU.375 hypothetical protein

Score: -82 Pvalue: 0.00540194

sRNA 25 GAAUGUGAGAUAGCGCCGACUGACUAACAAUCUGGAUAAGGAAAUACAACCUUUUCA 82

mRNA (SMU.375)                                      -79                                      CUUCCUUUUUAUCACAG---ACUGAUUGU-AGAAGUUGUC-----AGUGUUUGAAGGAU                                      -128

r2.7      **SMU.1392c** putative acetyltransferase  
Score: -80                                      Pvalue: 0.00711096

sRNA                                      8      CUUUCAGAAC--GAAAAUUGAAUGUGAGAUAGCGCCGACUGACUAACAAUCUGGAUAAGGAAUACAACCCUUU--CUAAAUUUCAUUUUU--AAACU----AUCAAAA                                      108

mRNA (SMU.1392c)                                      46      GAAAGUCUUGUCUUUAUAG---ACAUUGAA-CACGGUU-A--GAUU-----AUCUGUAUCUUCAGA---GGAAAAAGA---AAAUUAGAAAAUUUGAAUUAAGUUUUU                                      -47

r2.8      **SMU.874** bifunctional homocysteine S-methyltransferase/5,10-methylenetetrahydrofolate reductase protein  
Score: -80                                      Pvalue: 0.00711096

sRNA    48      CUAACAAUCUGGAUAAGGAAA-UCACAACCUUUCUAAA-UUUC--AAUUUUAAACUAUCAAAAUAUACACUUUGGAGACAUAUUAAAACCGU-AUGGC-GUA-UAGUUUACCGGUU-UUAAUGC-UCACUUUUACACUGCAA                                      183

mRNA (SMU. 874)                                      16      GGUCGUUAGACCGUACCAGUGAGGG--GGAAGGAAAUCAAAGGAUUA AAAACU-----GCUUGAAGGAAUCA-**CGUC**--GU-UGAUUUUGGAAAGUUUCGUCGUUACCAA-AGACCAAGAACUGCGCA---AAAAUUUGUGUU                                      -114

r2.9      **SMU.564** hypothetical protein  
Score: -78                                      Pvalue: 0.00935811

sRNA                                      21      AAUUGAAUGUGA--GAUAG-C-GCCGACUGACUAACAAUCUGGAUAAG-----GAAAUACAACCUUUCUAAAUUUCA-**UUAUU**                                      95

mRNA (SMU.564)                                      -113      **UUAACUUACA**UUUGCUAAAAGACGGAGAACUUUUUAUCAGACCGAUACGAAAACUUUA-UGUCGUAGACAGU-**AAAGUUC**AAAGAA                                      -195

**S7. Predicted smu-r2 promoter and terminator (A), secondary structure (B), and interaction with target mRNAs (C). A: The putative -35 and -10 regions were marked by green colour. The sequence of smu-r2 was underlined. The predicted transcription start was indicated by bold, while the putative terminator was marked by red colour.**

Figure S8

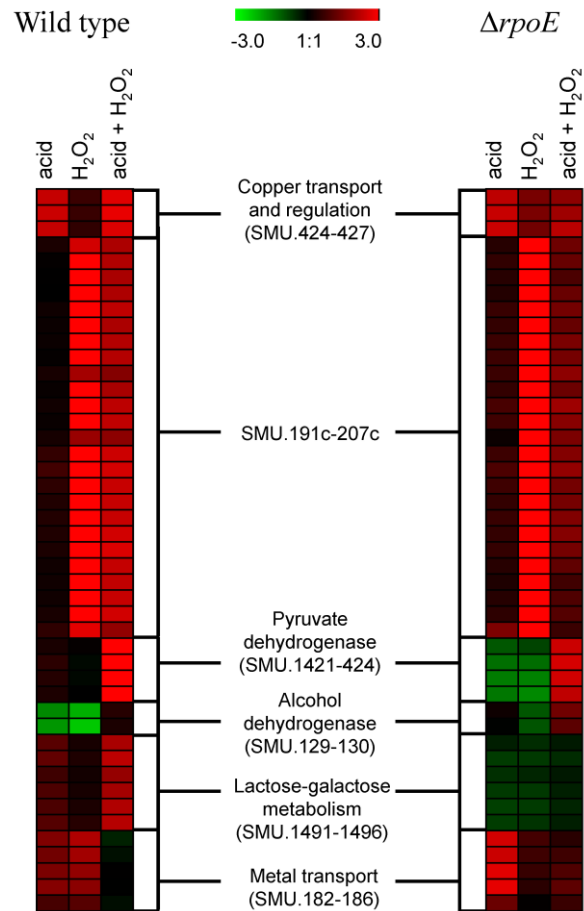

**S8. Hierarchical clustering of differentially expressed genes under stresses in *S. mutans* wild type and  $\Delta rpoE$  mutant strains.**

Gene expression ratios are calculated as log<sub>2</sub> fold changes under stresses comparing to the control (log-phase cells, before treatment). Red: up-regulated genes; green: down-regulated genes.

Table T1. Inhibition of growth of *S. mutans* wild type,  $\Delta rpoE$ , and  $\Delta rpoE_{comp}$  strains by tetracycline and kanamycin.

A: Tetracycline ( $\mu\text{g/ml}$ )<sup>a</sup>

|                      | 1              | 0.8 | 0.6 | 0.4            | 0.2 |
|----------------------|----------------|-----|-----|----------------|-----|
| WT                   | +              | +   | +   | +              | +   |
| $\Delta rpoE$        | -              | -   | -   | + <sup>b</sup> | +   |
| $\Delta rpoE_{comp}$ | + <sup>c</sup> | +   | +   | +              | +   |

B: Kanamycin ( $\mu\text{g/ml}$ )

|                      | 100 | 80             | 60 | 40 | 20 |
|----------------------|-----|----------------|----|----|----|
| WT                   | +   | +              | +  | +  | +  |
| $\Delta rpoE$        | -   | -              | +  | +  | +  |
| $\Delta rpoE_{comp}$ | -   | + <sup>c</sup> | +  | +  | +  |

<sup>a</sup> +: Visible growth; -: no visible growth.

<sup>b</sup>  $\Delta rpoE$  mutant forms flocks at the presence of 0.4  $\mu\text{g/ml}$  tetracycline.

<sup>c</sup>  $\Delta rpoE_{comp}$  strain showed weaker growth than the wild type strain.

Table T2. Differentially expressed non-coding regions in the  $\Delta rpoE$  mutant compared to the wild type strain under 5 experimental conditions, including normal growth at log-phase or early stationary-phase, growth under acid stress, H<sub>2</sub>O<sub>2</sub> stress, and acid+H<sub>2</sub>O<sub>2</sub>-stressed growth.

| #  | non-coding regions_start_stop<br>/ upstream gene-function<br>/ down-stream gene-function | Log2 fold change ( $\Delta rpoE$ / wild type) |                      |                 |                                              |                                                    | Gene Dir<br>type | Terminator<br>start_stop |
|----|------------------------------------------------------------------------------------------|-----------------------------------------------|----------------------|-----------------|----------------------------------------------|----------------------------------------------------|------------------|--------------------------|
|    |                                                                                          | log-<br>phase                                 | stationary<br>-phase | acid-<br>stress | H <sub>2</sub> O <sub>2</sub><br>-<br>stress | Acid+<br>H <sub>2</sub> O <sub>2</sub> -<br>stress |                  |                          |
| 1. | NC_004350__530356_530591                                                                 | 1.52                                          | 1.65                 | 1.18            | 1.13                                         | 1.37                                               | <-->             | 530364_<br>530404        |
|    | SMU.566c-hypothetical protein                                                            | -0.30                                         | -0.18                | 0.28            | -0.51                                        | -0.43                                              |                  |                          |
|    | SMU.567-putative glutamine ABC<br>transporter, permease                                  | -0.50                                         | -0.26                | -0.48           | -0.37                                        | 0.21                                               |                  |                          |
| 2. | NC_004350__739911_740429                                                                 | 1.16                                          | 1.55                 | 1.45            | 1.19                                         | 2.19                                               | -->              | 739940_<br>739955        |
|    | SMU.788-putative RNA<br>methyltransferase                                                | 0.39                                          | 0.69                 | 0.34            | 0.30                                         | 0.84                                               |                  |                          |
|    | SMU.789-hypothetical protein                                                             | 0.35                                          | 0.31                 | 0.30            | 0.05                                         | 0.98                                               |                  |                          |
| 3. | NC_004350__862809_862923                                                                 | 1.18                                          | 1.52                 | 1.37            | 1.27                                         | 1.67                                               | -->              | 862854_<br>862874        |
|    | SMU.906-putative ABC transporter,<br>ATP-binding protein                                 | 0.50                                          | 0.35                 | 0.48            | 0.28                                         | 1.06                                               |                  |                          |
|    | SMU.909-putative permease                                                                | 0.40                                          | 0.54                 | 0.39            | 0.36                                         | 0.36                                               |                  |                          |
| 4. | NC_004350__1894335_1894524                                                               | 1.25                                          | 1.58                 | 1.82            | 1.17                                         | 1.66                                               | <-->             | -                        |
|    | SMU.2027-putative transcriptional<br>regulator                                           | 0.22                                          | 0.50                 | 1.28            | 0.14                                         | -0.51                                              |                  |                          |
|    | SMU.2028-levansucrase precursor; beta-<br>D-fructosyltransferase                         | 0.25                                          | 0.12                 | -1.67           | 0.71                                         | -1.12                                              |                  |                          |
| 5. | NC_004350__1912245_1912417                                                               | 1.93                                          | 1.16                 | 1.69            | 1.13                                         | 1.68                                               | <-->             | -                        |
|    | SMU.2038-putative PTS system,<br>trehalose-specific IIABC component                      | -0.23                                         | -0.96                | -0.65           | -1.16                                        | 0.91                                               |                  |                          |
|    | SMU.2040-putative transcriptional<br>regulator; repressor of the trehalose<br>operon     | -0.03                                         | -0.24                | 0.14            | 0.24                                         | 0.13                                               |                  |                          |

|    |                                                                |       |       |       |       |       |      |   |
|----|----------------------------------------------------------------|-------|-------|-------|-------|-------|------|---|
| 6. | NC_004350__1919190_1919336                                     | 1.53  | 1.71  | 1.42  | 1.29  | 2.25  | <--> | - |
|    | SMU.2044-putative stringent response protein, ppGpp synthetase | -0.49 | -0.15 | -0.14 | 0.03  | -0.86 |      |   |
|    | SMU.2046c-hypothetical protein                                 | 1.51  | 0.26  | 0.87  | -0.30 | 1.23  |      |   |
| 7. | NC_004350__368829_368962                                       | 1.83  | 2.31  | 2.35  | 1.51  | 2.31  | <--> | - |
|    | SMU.392c-hypothetical protein                                  | 0.71  | 1.18  | 1.03  | 0.73  | 0.71  |      |   |
|    | SMU.393-hypothetical protein                                   | -0.30 | 0.13  | 1.25  | -0.57 | 0.92  |      |   |
| 8. | NC_004350__381368_381675                                       | 1.03  | 2.46  | 2.48  | 1.54  | 3.31  | <--> | - |
|    | SMU.406c-hypothetical protein                                  | -0.18 | 0.02  | 0.23  | -0.29 | 0.36  |      |   |
|    | SMU.407-hypothetical protein                                   | 0.22  | 0.13  | 0.15  | 0.54  | 0.71  |      |   |
| 9. | NC_004350__401703_402053                                       | 1.34  | 1.48  | 1.32  | 1.29  | 1.64  | <--> | - |
|    | SMU.429c-hypothetical protein                                  | -0.24 | -0.04 | -0.23 | -0.43 | -0.39 |      |   |
|    | SMU.431-putative ABC transporter, ATP-binding protein          | 0.60  | 0.41  | 0.52  | 0.53  | -0.07 |      |   |

-: no terminator was found.

Table T3. Differentially expressed genes in the  $\Delta rpoE$  mutant compared to the wild type under log-phase or early stationary-phase growth conditions.

| Locus Tag                                                                      | Gene symbol | Gene description                                                 | Log2 fold change<br>( $\Delta rpoE$ / wild type) |                        |
|--------------------------------------------------------------------------------|-------------|------------------------------------------------------------------|--------------------------------------------------|------------------------|
|                                                                                |             |                                                                  | Log-phase                                        | Early stationary-phase |
| <b>Carbohydrate transport and metabolism, energy production and conversion</b> |             |                                                                  |                                                  |                        |
| SMU.870                                                                        | <i>fruR</i> | putative transcriptional regulator                               | -2.71                                            | -0.70                  |
| SMU.871                                                                        | <i>pfkB</i> | putative fructose-1-phosphate kinase                             | -2.70                                            | -0.64                  |
| SMU.872                                                                        | <i>fxpC</i> | putative fructose-PTS II ABC                                     | -2.75                                            | -0.51                  |
| SMU.877                                                                        | <i>agaL</i> | alpha-galactosidase                                              | 3.60                                             | 0.96                   |
| SMU.878                                                                        | <i>msmE</i> | multiple sugar-binding ABC transporter,<br>sugar-binding protein | 3.60                                             | 0.65                   |
| SMU.879                                                                        | <i>msmF</i> | multiple sugar-binding ABC transporter,<br>permease              | 3.25                                             | 0.36                   |
| SMU.880                                                                        | <i>msmG</i> | multiple sugar-binding ABC transporter,<br>permease              | 3.41                                             | 0.58                   |
| SMU.881                                                                        | <i>gtfA</i> | sucrose phosphorylase                                            | 3.04                                             | 0.22                   |
| SMU.882                                                                        | <i>msmK</i> | multiple sugar-binding ABC transporter,<br>ATP-binding protein   | 3.00                                             | 0.21                   |
| SMU.883                                                                        | <i>dexB</i> | dextran glucosidase DexB                                         | 3.10                                             | 0.23                   |
| SMU.885                                                                        | <i>galR</i> | galactose operon repressor GalR                                  | 2.00                                             | 0.64                   |
| SMU.886                                                                        | <i>galK</i> | galactokinase                                                    | 3.86                                             | 0.37                   |
| SMU.887                                                                        | <i>galT</i> | galactose-1-phosphate uridylyltransferase                        | 3.76                                             | 0.48                   |

|           |              |                                                              |      |       |
|-----------|--------------|--------------------------------------------------------------|------|-------|
| SMU.888   | <i>galE</i>  | UDP-galactose 4-epimerase, GalE                              | 1.72 | 0.88  |
| SMU.113   | <i>pfk</i>   | putative fructose-1-phosphate kinase                         | 0.59 | -4.25 |
| SMU.114   | <i>fruC</i>  | putative fructose-PTS IIBC                                   | 0.63 | -4.17 |
| SMU.115   | <i>fruD</i>  | putative fructose-PTS IIA                                    | 0.43 | -3.05 |
| SMU.116   | <i>lacD2</i> | tagatose 1,6-diphosphate aldolase                            | 0.79 | -3.47 |
| SMU.1956c | <i>levX</i>  | hypothetical protein                                         | 1.49 | 2.91  |
| SMU.1957  | <i>levG</i>  | putative fructose/mannose-PTS IID                            | 1.34 | 2.71  |
| SMU.1958c | <i>levF</i>  | putative fructose/mannose-PTS IIC                            | 1.18 | 2.55  |
| SMU.1960c | <i>levE</i>  | putative fructose/mannose-PTS IIB                            | 1.58 | 3.13  |
| SMU.1961c | <i>levD</i>  | putative fructose/mannose-PTS IIA                            | 1.50 | 3.17  |
| SMU.78    | <i>fruA</i>  | fructan hydrolase                                            | 3.14 | 2.64  |
| SMU.79    | <i>fruB</i>  | fructan hydrolase                                            | 2.46 | 2.56  |
| SMU.1421  | <i>pdhC</i>  | branched-chain alpha-keto acid<br>dehydrogenase subunit E2   | 1.18 | -0.99 |
| SMU.1422  | <i>pdhB</i>  | putative pyruvate dehydrogenase E1<br>component beta subunit | 1.75 | -1.29 |
| SMU.1423  | <i>pdhA</i>  | putative pyruvate dehydrogenase                              | 1.78 | -2.04 |
| SMU.1424  | <i>pdhD</i>  | putative dihydrolipoamide dehydrogenase                      | 1.70 | -2.15 |
| SMU.148   | <i>adhE</i>  | bifunctional acetaldehyde-CoA/alcohol<br>dehydrogenase       | 0.98 | -1.35 |

#### Amino acid transport

|          |              |                                                                       |       |       |
|----------|--------------|-----------------------------------------------------------------------|-------|-------|
| SMU.1062 | <i>opuAb</i> | putative proline/glycine betaine ABC<br>transporter, permease protein | -1.55 | -1.84 |
| SMU.1063 | <i>opuAa</i> | putative proline/glycine betaine ABC<br>transporter, ATP-binding      | -1.54 | -1.93 |



|          |              |                                                                 |       |       |
|----------|--------------|-----------------------------------------------------------------|-------|-------|
| SMU.2116 | <i>opuCa</i> | putative osmoprotectant amino acid ABC transporter, ATP-binding | -1.14 | -0.95 |
| SMU.2117 | <i>opuCb</i> | putative osmoprotectant ABC transporter; permease               | -1.19 | -1.02 |
| SMU.2118 | <i>opuCc</i> | putative osmoprotectant-binding protein                         | -1.17 | -1.04 |
| SMU.2119 | <i>opuCd</i> | putative osmoprotectant ABC transporter; permease protein       | -1.2  | -1.09 |

#### Iron transport

|         |   |                                                              |      |      |
|---------|---|--------------------------------------------------------------|------|------|
| SMU.995 | - | ferrichrome ABC transporter, permease                        | 0.89 | 0.88 |
| SMU.996 | - | ferrichrome ABC transporter, permease                        | 0.95 | 1.12 |
| SMU.997 | - | ferrichrome ABC transporter, ATP-binding                     | 1.09 | 1.35 |
| SMU.998 | - | ferrichrome ABC transporter, periplasmic ferrichrome-binding | 1.06 | 1.27 |

---

Table T4. Confirmation of differential gene expression by quantitative PCR in comparison to the microarray results.

|             | Microarray Fold change ( $\Delta rpoE$ / wild type) |       |       |       |       |                    | Real-time PCR Fold change ( $\Delta rpoE$ / wild type) |             |            |            |            |
|-------------|-----------------------------------------------------|-------|-------|-------|-------|--------------------|--------------------------------------------------------|-------------|------------|------------|------------|
|             | M0/W0                                               | M1/W1 | M2/W2 | M3/W3 | M4/W4 | ajusted<br>p value | M0/W0                                                  | M1/W1       | M2/W2      | M3/W3      | M4/W4      |
| <i>levD</i> | 2.83                                                | 8.99  | 0.95  | 0.33  | 0.65  | 1.25<br>E-08       | 6.88 ±0.06                                             | 19.76 ±0.08 | 0.38 ±0.48 | 0.25 ±0.04 | 0.17 ±0.52 |
| <i>msmE</i> | 12.15                                               | 1.57  | 0.44  | 0.99  | 1.44  | 1.35<br>E-12       | 23.17 ±0.22                                            | 1.74 ±0.42  | 0.31 ±0.13 | 0.72 ±0.01 | 0.80 ±0.06 |
| <i>hisC</i> | 0.25                                                | 0.21  | 0.31  | 0.48  | 0.21  | 6.07<br>E-15       | 0.24 ±0.02                                             | 0.21 ±0.07  | 0.29 ±0.04 | 0.39 ±0.01 | 0.20 ±0.02 |
| <i>fruC</i> | 1.55                                                | 0.06  | 1.47  | 1.28  | 0.99  | 1.92<br>E-10       | 2.48 ±0.01                                             | 0.40 ±0.01  | 1.50 ±0.01 | 3.54 ±0.01 | 1.59 ±0.00 |
